# Supplementary material
Source: ML conference proceedings conference paper supplement (https://openaccess.thecvf.com/content/CVPR2024/html/Wu_Mitigating_Object_Dependencies_CVPR_2024_paper.html)
Supplement: Supplementary file 1 [file Wu_Mitigating_Object_Dependencies_CVPR_2024_supplemental.pdf]

# Mitigating Object Dependencies: Improving Point Cloud Self-Supervised Learning through Object Exchange

## Supplementary Material

### 001 A. The relative weight of the auxiliary task loss.

002  $\gamma$  is the relative weight of the auxiliary task loss in Eq.6  
003 in the main paper. To study the impact of it, we gradually  
004 increase the relative weight  $\gamma$ . As shown in Fig. 1, with  
005 the increase of  $\gamma$ , the performance first increase and then  
006 decrease.

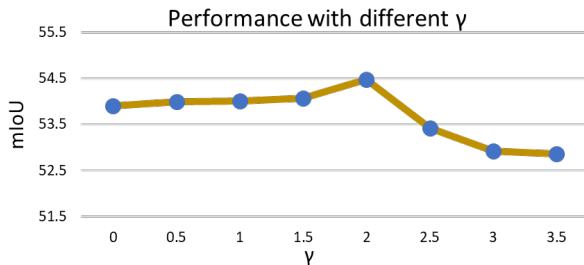

Figure 1. mIoU comparison under pre-training models with different  $\gamma$ . All the models are pre-trained and fine-tuned on ScanNet

### 007 B. Detailed ScanNet-C.

008 In Section 4.3 of the main paper, to evaluate the per-  
009 formance of models in changing contexts, we create a new  
010 dataset, ScanNet-C, by replacing a proportion  $\delta$  of the ob-  
011 jects in ScanNet.

012 Specifically, for each point cloud  $P^m$  with  $N_m$  objects  
013 in ScanNet, we randomly select a point cloud  $P^n$  with  $N_n$   
014 from the entire dataset. And then  $\delta N_m$  objects in  $P^m$  are  
015 replaced with objects sharing comparable size from  $P^n$  using  
016 the object-exchanging strategy mentioned in the main pa-  
017 per. We replace objects in each point cloud in ScanNet and  
018 range  $\delta$  from 0.1 to 0.9 in the experiments. In Fig. 2, we vi-  
019 sualize the scenes in ScanNet and the corresponding scenes  
020 in ScanNet-C. As shown in the figure, the inter-object cor-  
021 relations are changed, for example, a bed is replaced with a  
022 chair on the left of Fig. 2. In Table. 2, we show each indi-  
023 vidual run on ScanNet-C semantic segmentation with varied  
024 proportions  $\delta$ . As the table shows, our OESSL outperforms  
025 all other methods under all  $\delta$ .

### 026 C. Detailed results and visualization.

027 The number of training epochs for every label regime can  
028 be found in Table 1. For completeness, we report in Table. 3  
029 and Table. 4 the mIoU of each of the three individual runs  
030 performed to obtain the main results in the paper. As the  
031 table shows, our method performs better than other methods  
032 consistently.

| Label regime  | 10%  | 20% | 50% | 100% |
|---------------|------|-----|-----|------|
| ScanNet [2]   | 250  | 250 | 100 | 75   |
| S3DIS [1]     | 400  | 300 | 200 | 200  |
| Label regime  | 0.1% | 1%  | 10% | 100% |
| Synthia4D [4] | 250  | 200 | 25  | 20   |

Table 1. Number of training epochs used for different label regimes on different datasets.

### References

- [1] Iro Armeni, Ozan Sener, Amir R Zamir, Helen Jiang, Ioannis Brilakis, Martin Fischer, and Silvio Savarese. 3d semantic parsing of large-scale indoor spaces. In *Proceedings of the IEEE conference on computer vision and pattern recognition*, pages 1534–1543, 2016. 1, 3
- [2] Angela Dai, Angel X Chang, Manolis Savva, Maciej Halber, Thomas Funkhouser, and Matthias Nießner. Scannet: Richly-annotated 3d reconstructions of indoor scenes. In *Proceedings of the IEEE conference on computer vision and pattern recognition*, pages 5828–5839, 2017. 1, 3
- [3] Siyuan Huang, Yichen Xie, Song-Chun Zhu, and Yixin Zhu. Spatio-temporal self-supervised representation learning for 3d point clouds. In *Proceedings of the IEEE/CVF International Conference on Computer Vision*, pages 6535–6545, 2021. 3
- [4] German Ros, Laura Sellart, Joanna Materzynska, David Vazquez, and Antonio M Lopez. The synthia dataset: A large collection of synthetic images for semantic segmentation of urban scenes. In *Proceedings of the IEEE conference on computer vision and pattern recognition*, pages 3234–3243, 2016. 1, 3
- [5] Xiaoyang Wu, Xin Wen, Xihui Liu, and Hengshuang Zhao. Masked scene contrast: A scalable framework for unsupervised 3d representation learning. In *Proceedings of the IEEE/CVF Conference on Computer Vision and Pattern Recognition*, pages 9415–9424, 2023. 2, 3
- [6] Zaiwei Zhang, Rohit Girdhar, Armand Joulin, and Ishan Misra. Self-supervised pretraining of 3d features on any point-cloud. In *Proceedings of the IEEE/CVF International Conference on Computer Vision*, pages 10252–10263, 2021. 2, 3

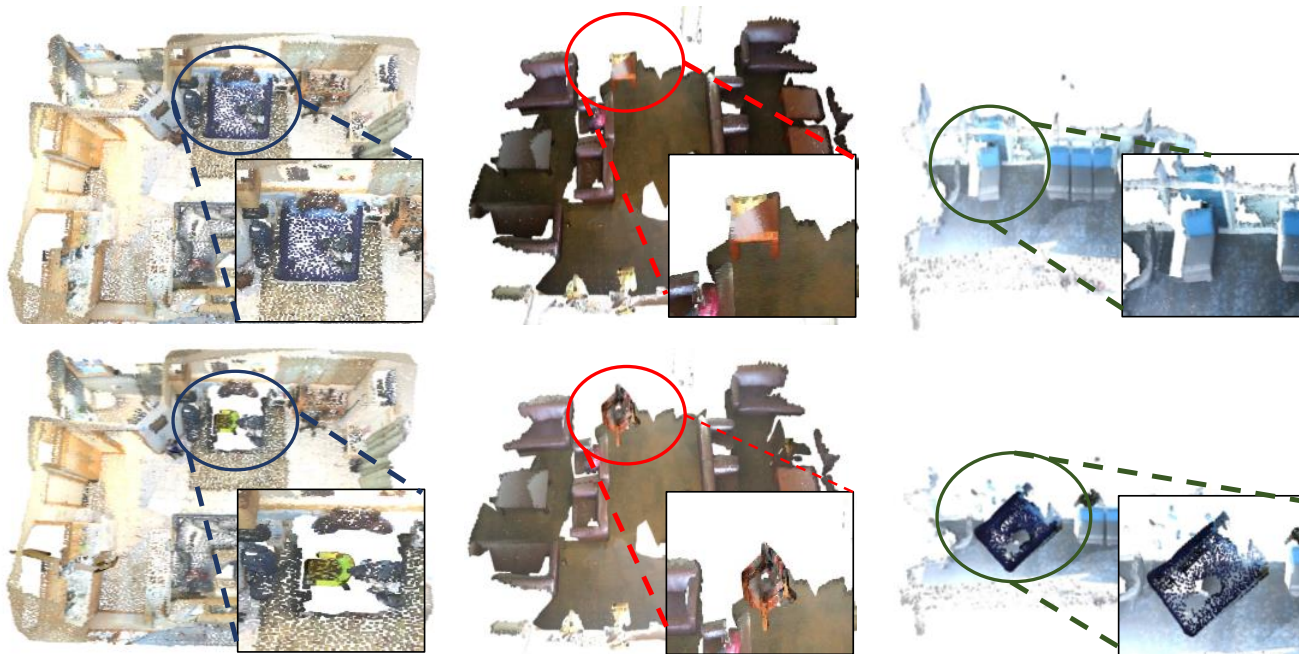

Figure 2. **Top:** Visualization of scenes in ScanNet. **Bottom:** Visualization of corresponding scenes in ScanNet-C

| Method            |         | 0     | 0.1   | 0.2   | 0.3   | 0.4   | 0.5   | 0.6   | 0.7   | 0.8   | 0.9   |
|-------------------|---------|-------|-------|-------|-------|-------|-------|-------|-------|-------|-------|
| From Scratch      | Runs    | 51.73 | 46.51 | 40.66 | 37.82 | 34.09 | 30.79 | 30.43 | 27.60 | 26.38 | 26.29 |
|                   |         | 51.73 | 46.15 | 40.92 | 36.52 | 33.65 | 30.97 | 29.30 | 28.28 | 26.37 | 24.83 |
|                   |         | 51.73 | 46.22 | 42.21 | 35.81 | 33.46 | 30.64 | 30.01 | 29.21 | 26.39 | 25.51 |
|                   | Average | 51.73 | 46.29 | 41.26 | 36.72 | 33.73 | 30.80 | 29.91 | 28.36 | 26.38 | 25.55 |
| DepthContrast [6] | Runs    | 51.36 | 45.59 | 39.58 | 37.65 | 33.27 | 30.55 | 30.15 | 27.47 | 26.77 | 25.63 |
|                   |         | 51.36 | 45.67 | 40.15 | 36.59 | 33.18 | 30.28 | 28.80 | 27.95 | 26.46 | 25.14 |
|                   |         | 51.36 | 45.15 | 41.84 | 34.90 | 33.02 | 30.71 | 29.61 | 28.76 | 26.71 | 25.48 |
|                   | Average | 51.36 | 45.47 | 40.52 | 36.38 | 33.15 | 30.51 | 29.52 | 28.06 | 26.65 | 25.42 |
| MSC [5]           | Runs    | 55.50 | 49.85 | 43.28 | 41.72 | 37.56 | 34.25 | 33.67 | 30.85 | 29.87 | 28.82 |
|                   |         | 55.50 | 49.68 | 43.95 | 40.74 | 36.86 | 33.60 | 32.44 | 31.19 | 29.20 | 27.98 |
|                   |         | 55.50 | 49.49 | 45.48 | 39.07 | 37.22 | 34.10 | 33.17 | 32.40 | 29.05 | 28.70 |
|                   | Average | 55.50 | 49.67 | 44.24 | 40.51 | 37.21 | 33.98 | 33.09 | 31.48 | 29.37 | 28.50 |
| OESSL(Ours)       | Runs    | 56.72 | 51.54 | 44.98 | 42.95 | 38.30 | 35.82 | 35.46 | 32.10 | 31.32 | 29.86 |
|                   |         | 56.72 | 50.77 | 45.49 | 41.87 | 38.41 | 35.10 | 33.48 | 32.79 | 30.32 | 29.52 |
|                   |         | 56.72 | 51.13 | 47.34 | 40.89 | 38.58 | 35.55 | 34.29 | 33.52 | 30.97 | 30.01 |
|                   | Average | 56.72 | 51.15 | 45.94 | 41.90 | 38.43 | 35.49 | 34.41 | 32.80 | 30.87 | 29.80 |

Table 2. Detailed of individual runs on **ScanNet-C** semantic segmentation with different proportions  $\delta$  of replaced objects. We report mIoU% for each of the individual runs averaged in the main paper.

|      |                   | ScanNet [2]  |              |              |              | S3DIS [1]    |              |              |              |
|------|-------------------|--------------|--------------|--------------|--------------|--------------|--------------|--------------|--------------|
|      |                   | Validation   |              |              |              | Area5        |              |              |              |
| %    | Method            | Split 1      | Split 2      | Split 3      | Average      | Split 1      | Split 2      | Split 3      | Average      |
| 10%  | From Scratch      | 51.73        | 46.12        | 49.12        | 48.99        | 35.32        | 41.86        | 44.27        | 40.48        |
|      | DepthContrast [6] | 51.36        | 49.93        | 49.6         | 50.30        | 45.10        | 47.84        | 46.76        | 46.57        |
|      | STRL [3]          | 50.29        | 48.00        | 42.52        | 46.94        | 31.21        | 37.42        | 42.33        | 36.99        |
|      | MSC [5]           | 55.5         | 52.71        | 53.34        | 53.85        | 43.61        | 48.46        | 42.48        | 44.85        |
|      | OESSL(Ours)       | <b>56.72</b> | <b>52.97</b> | <b>53.43</b> | <b>54.37</b> | <b>46.71</b> | <b>49.88</b> | <b>51.07</b> | <b>49.22</b> |
| 20%  | From Scratch      | 55.22        | 57.78        | 59.73        | 57.58        | 43.02        | 49.92        | 44.88        | 45.94        |
|      | DepthContrast [6] | 55.81        | 57.59        | 57.83        | 57.08        | 46.55        | 48.52        | 47.95        | 47.67        |
|      | STRL [3]          | 57.85        | 59.01        | 59.97        | 58.94        | 44.48        | 49.6         | 44.44        | 46.13        |
|      | MSC [5]           | 59.67        | 59.85        | 61.88        | 60.47        | 46.17        | 52.4         | 51.8         | 50.12        |
|      | OESSL(Ours)       | <b>60.33</b> | <b>60.58</b> | <b>62.91</b> | <b>61.27</b> | <b>49.75</b> | <b>55.53</b> | <b>52.72</b> | <b>52.67</b> |
| 50%  | From Scratch      | 62.38        | 61.51        | 61.22        | 61.70        | 51.27        | 53.51        | 54.97        | 53.25        |
|      | DepthContrast [6] | 61.66        | 61.89        | 60.87        | 61.47        | 52.86        | 53.55        | 55.14        | 53.85        |
|      | STRL [3]          | 61.78        | 62.38        | 61.38        | 61.85        | 54.19        | 55.56        | 55.58        | 55.11        |
|      | MSC [5]           | <b>63.92</b> | 64.66        | 63.36        | 63.98        | 56.56        | 56.48        | 58.43        | 57.16        |
|      | OESSL(Ours)       | 63.67        | <b>65.46</b> | <b>64.54</b> | <b>64.56</b> | <b>60.98</b> | <b>61.95</b> | <b>62.43</b> | <b>61.79</b> |
| 100% | From Scratch      | 71.40        | 70.98        | 70.94        | 71.11        | 65.54        | 66.18        | 66.75        | 66.16        |
|      | DepthContrast [6] | 70.78        | 71.00        | 70.98        | 70.92        | 63.68        | 61.18        | 65.41        | 63.42        |
|      | STRL [3]          | 70.38        | <b>71.56</b> | 71.15        | 71.03        | 66.13        | 65.92        | 62.08        | 64.71        |
|      | MSC [5]           | <b>71.52</b> | 70.84        | 70.64        | 71.00        | 65.83        | 63.55        | <b>66.83</b> | 65.40        |
|      | OESSL(Ours)       | 71.29        | 71.24        | <b>71.32</b> | <b>71.28</b> | <b>67.55</b> | <b>67.49</b> | 65.65        | <b>66.90</b> |

Table 3. Details of individual runs on **ScanNet** and **S3DIS** semantic segmentation. Each run corresponds to fine-tuning using a different regime. We report mIoU% for each of the individual runs averaged in the main paper

|      |                   | Synthia4D [4] |              |              |              | Synthia4D [4] |              |              |              |
|------|-------------------|---------------|--------------|--------------|--------------|---------------|--------------|--------------|--------------|
|      |                   | Test          |              |              |              | Validation    |              |              |              |
| %    | Method            | Split 1       | Split 2      | Split 3      | Average      | Split 1       | Split 2      | Split 3      | Average      |
| 0.1% | From Scratch      | 16.81         | 21.92        | 20.79        | 19.84        | 17.66         | 21.57        | 21.28        | 20.17        |
|      | DepthContrast [6] | 48.87         | 44.69        | 44.78        | 46.11        | 46.20         | 46.55        | 45.93        | 46.23        |
|      | STRL [3]          | 46.34         | 32.92        | 39.65        | 39.64        | 43.67         | 41.37        | 29.77        | 38.27        |
|      | MSC [5]           | 49.51         | 45.58        | 46.24        | 47.11        | 45.39         | 46.31        | 47.55        | 46.42        |
|      | OESSL(Ours)       | <b>52.56</b>  | <b>48.13</b> | <b>49.62</b> | <b>49.44</b> | <b>50.82</b>  | <b>49.11</b> | <b>48.04</b> | <b>49.32</b> |
| 1%   | From Scratch      | 63.38         | 62.80        | 63.92        | 63.37        | 67.74         | 67.77        | 67.92        | 67.81        |
|      | DepthContrast [6] | 66.60         | 67.17        | 64.97        | 66.25        | 71.14         | 71.57        | 72.27        | 71.66        |
|      | STRL [3]          | 67.67         | 64.88        | 64.23        | 65.59        | 71.63         | 71.26        | 68.59        | 70.49        |
|      | MSC [5]           | 67.08         | 65.23        | 66.95        | 66.42        | 72.93         | 71.83        | 69.98        | 71.58        |
|      | OESSL(Ours)       | <b>68.26</b>  | <b>70.83</b> | <b>67.16</b> | <b>68.75</b> | <b>73.88</b>  | <b>74.66</b> | <b>73.98</b> | <b>74.17</b> |
| 10%  | From Scratch      | 71.84         | 68.75        | 70.76        | 70.45        | 75.22         | 73.17        | 74.66        | 74.35        |
|      | DepthContrast [6] | 69.31         | 70.82        | 71.33        | 70.49        | 73.04         | 74.65        | 74.31        | 74.00        |
|      | STRL [3]          | 67.32         | 70.78        | 70.26        | 69.45        | 75.54         | 72.92        | 72.95        | 73.80        |
|      | MSC [5]           | <b>72.64</b>  | 73.50        | 73.30        | 73.15        | 75.52         | 74.96        | 76.10        | 75.53        |
|      | OESSL(Ours)       | 71.40         | <b>73.73</b> | <b>75.12</b> | <b>73.42</b> | <b>76.60</b>  | <b>77.16</b> | <b>77.37</b> | <b>77.04</b> |
| 100% | From Scratch      | <b>77.57</b>  | 77.06        | 76.37        | 77.00        | 80.71         | 80.74        | 80.06        | 80.50        |
|      | DepthContrast [6] | 76.72         | 75.34        | 73.56        | 75.21        | 76.88         | 79.44        | 79.36        | 78.56        |
|      | STRL [3]          | 77.34         | 76.53        | 78.11        | 77.33        | 81.28         | <b>81.66</b> | 79.92        | 80.95        |
|      | MSC [5]           | 76.80         | 77.75        | 77.11        | 77.25        | 80.84         | 80.78        | <b>81.52</b> | 81.05        |
|      | OESSL(Ours)       | 76.05         | <b>78.10</b> | <b>78.29</b> | <b>77.48</b> | <b>81.41</b>  | 81.20        | 81.32        | <b>81.31</b> |

Table 4. Details of individual runs on **Synthia4D** semantic segmentation. Each run corresponds to fine-tuning using a different regime. We report mIoU% for each of the individual runs averaged in the main paper.
